# Supplementary material for: Short-term hypoxic preconditioning promotes prevascularization in 3D bioprinted bone constructs with stromal vascular fraction derived cells
Source: PubMed Central journal article supplement (PMC5472052; doi:10.1039/c7ra04372d), 2017-06-05
Supplement: RA-007-C7RA04372D-s001.pdf [file RA-007-C7RA04372D-s001.pdf]

## Support information

# Short-Term Hypoxic Preconditioning Promotes Prevascularization in 3D Bioprinted Bone Constructs with Stromal Vascular Fraction Derived Cells

Mitchell A. Kuss,<sup>ab</sup> Robert Harms,<sup>ae</sup> Shaohua Wu,<sup>ab</sup> Ying Wang,<sup>ab</sup> Jason B. Untrauer,<sup>c</sup> Mark A. Carlson<sup>ad</sup> and Bin Duan<sup>\*abe</sup>

<sup>a</sup>Mary & Dick Holland Regenerative Medicine Program, University of Nebraska Medical Center, Omaha, NE, USA

<sup>b</sup>Division of Cardiology, Department of Internal Medicine, University of Nebraska Medical Center, Omaha, NE, USA

<sup>c</sup>Division of Oral & Maxillofacial Surgery, Department of Surgery, College of Medicine, University of Nebraska Medical Center, Omaha, NE, USA

<sup>d</sup>Department of Surgery, University of Nebraska Medical Center and the VA Nebraska-Western Iowa Health Care System, Omaha, NE, USA

<sup>e</sup>Department of Surgery, College of Medicine, University of Nebraska Medical Center, Omaha, NE, USA

\*Corresponding author: E-mail address: [bin.duan@unmc.edu](mailto:bin.duan@unmc.edu); Phone: (402) 559-9637

**Supplemental Table S1** Real-Time PCR Primers

| Gene symbol | Genbank ID     | Primer sequences (5'→3')                           | Product size (bp) |
|-------------|----------------|----------------------------------------------------|-------------------|
| 18S         | NR_003286      | F:GAGAAACGGCTACCACATCC<br>R: CACCAGACTTGCCCTCCA    | 170               |
| VEGFA       | NM_001025366.2 | F: CTGGAGCGTGTACGTTGGT<br>R: TGCAACGCGAGTCTGTGTTT  | 155               |
| PECAM1      | NM_000442.4    | F: CCACGCCTAGCCAAAATCAC<br>R:CATGTGGCCCCTCAGAAGAC  | 136               |
| VE-cadherin | NM_001795.4    | F:ATGAGATCGTGGTGGAAGCG<br>R: TGTGTACTTGGTCTGGGTGA  | 125               |
| HIF1A       | NM_001530.3    | F: ATCACCCCTCTTCGTCGCTTC<br>R: GAAAGGCAAGTCCAGAGGT | 164               |
| ALP         | NM_000478      | F: CCACAAGCCCGTGACAGA<br>R: GGGCGGCAGACTTTGGTT     | 127               |
| Runx2       | NM_001024630   | F: TACCTGAGCCAGATGACG<br>R: AAGGCCAGAGGCAGAAGT     | 145               |
| OCN         | NM_199173      | F: GGCAGCGAGGTAGTGAAGA<br>R: CCTGAAAGCCGATGTGGT    | 148               |

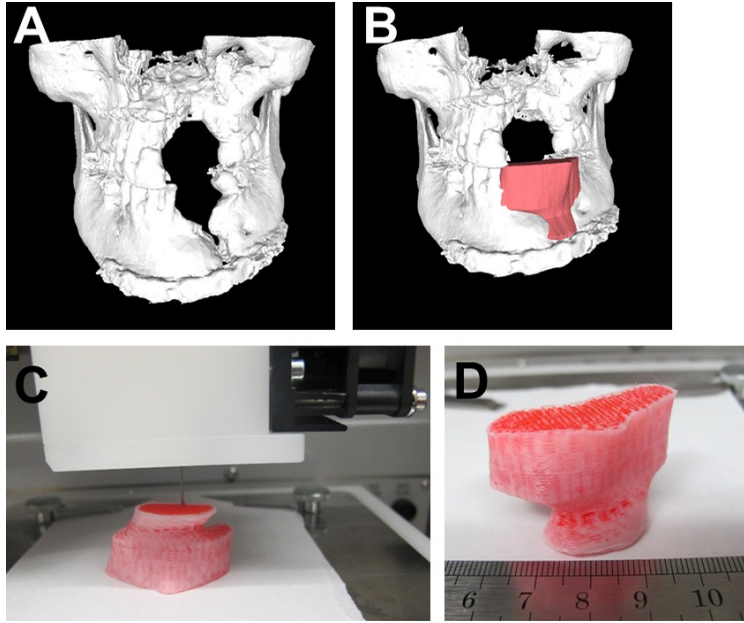

**Figure S1.** 3D hybrid printed human sized mandibular bone construct. (A) Reconstructed skull model from a patient with facial defect; (B) reconstruction of lower jaw bone; (C) 3D hybrid printing of the reconstructed lower jaw bone; (D) 3D printed bone construct with human size and anatomical architecture.
